# Supplementary material for: Zinc-dependent regulation of zinc import and export genes by Zur
Source: PubMed Central journal article supplement (PMC5472717; doi:10.1038/ncomms15812), 2017-06-09
Supplement: ncomms15812-s1.pdf [file ncomms15812-s1.pdf]

**Supplementary Table 1. Highly represented Zur-bound regions (peaks) in the genome of *Streptomyces coelicolor***

| peak     | peak_position | peak_intensity | location   | distance_ORF | related_gene_id | gene_symbol | strand | gene description                                 |
|----------|---------------|----------------|------------|--------------|-----------------|-------------|--------|--------------------------------------------------|
| peak_123 | 7378821       | 4.4097         | internal   | -487         | SCO6643         | -           | +      | hypothetical protein                             |
| peak_123 | 7378821       | 4.4097         | intergenic | 176          | SCO6644         | -           | +      | solute-binding lipoprotein                       |
| peak_023 | 2703951       | 4.3752         | intergenic | 108          | SCO2504         | glyS        | -      | glycyl-tRNA synthetase                           |
| peak_023 | 2703951       | 4.3752         | intergenic | 53           | SCO2505         | znuA        | +      | ABC-transporter lipoprotein                      |
| peak_124 | 3535835       | 4.2727         | internal   | -13          | SCO3223         | -           | -      | ABC transporter                                  |
| peak_095 | 7508206       | 4.2402         | intergenic | 90           | SCO6751         | zitB        | -      | CDF type efflux protein                          |
| peak_095 | 7508206       | 4.2402         | intergenic | 388          | SCO6752         | -           | +      | integral membrane transferase                    |
| peak_040 | 6081704       | 4.1852         | intergenic | 121          | SCO5579         | -           | -      | transmembrane protein                            |
| peak_040 | 6081704       | 4.1852         | intergenic | 34           | SCO5580         | -           | +      | docking protein                                  |
| peak_017 | 497296        | 4.1195         | intergenic | 79           | SCO0476         | znuC2       | +      | ABC transporter ATP-binding protein              |
| peak_071 | 497296        | 4.1195         | internal   | -63          | SCO0475         | znuB2       | -      | ABC transporter protein                          |
| peak_050 | 3847121       | 4.0349         | internal   | -528         | SCO3483         | -           | -      | integral membrane transport protein              |
| peak_157 | 3847121       | 4.0349         | intergenic | 431          | SCO3482         | -           | -      | sugar-permease                                   |
| peak_024 | 4935364       | 3.9649         | intergenic | 257          | SCO4511         | -           | -      | hypothetical protein                             |
| peak_131 | 4935364       | 3.9649         | internal   | -321         | SCO4512         | -           | -      | hypothetical protein                             |
| peak_120 | 7867711       | 3.9486         | internal   | -587         | SCO7077         | -           | -      | hypothetical protein                             |
| peak_063 | 4151488       | 3.9347         | intergenic | 166          | SCO3775         | -           | -      | hypothetical protein                             |
| peak_103 | 4151488       | 3.9347         | intergenic | 360          | SCO3777         | -           | +      | peptidase                                        |
| peak_155 | 4151488       | 3.9347         | internal   | -187         | SCO3776         | -           | +      | hypothetical protein                             |
| peak_016 | 5962697       | 3.9341         | internal   | -602         | SCO5476         | -           | +      | oligopeptide transport integral membrane protein |
| peak_040 | 5962697       | 3.9341         | intergenic | 477          | SCO5477         | -           | +      | putative oligopeptide-binding lipoprotein        |
| peak_035 | 3935881       | 3.8549         | intergenic | 79           | SCO3559         | -           | -      | oxidoreductase                                   |
| peak_035 | 3935881       | 3.8549         | intergenic | 24           | SCO3560         | -           | +      | ATP-binding protein                              |
| peak_156 | 665195        | 3.8451         | internal   | -578         | SCO0624         | -           | -      | hypothetical protein                             |

|          |         |        |            |       |         |       |   |                                             |
|----------|---------|--------|------------|-------|---------|-------|---|---------------------------------------------|
| peak_165 | 7898179 | 3.7833 | internal   | -85   | SCO7108 | -     | - | hypothetical protein                        |
| peak_163 | 8001349 | 3.7229 | internal   | -988  | SCO7197 | -     | - | amino acid ABC transporter permease         |
| peak_009 | 3791129 | 3.6854 | intergenic | 26    | SCO3428 | rpmG  | - | 50S ribosomal protein L33                   |
| peak_011 | 3791129 | 3.6854 | intergenic | 197   | SCO3427 | rpmE2 | - | 50S ribosomal protein L31                   |
| peak_121 | 3791129 | 3.6854 | intergenic | 62    | SCO3429 | rpmB  | + | 50S ribosomal protein L28                   |
| peak_121 | 3791129 | 3.6854 | intergenic | 283   | SCO3430 | rpsN  | + | 30S ribosomal protein S14                   |
| peak_171 | 3791129 | 3.6854 | intergenic | 448   | SCO3426 | -     | - | hypothetical protein                        |
| peak_019 | 6186618 | 3.6792 | intergenic | 173   | SCO5682 | -     | - | hypothetical protein                        |
| peak_081 | 6186618 | 3.6792 | internal   | -30   | SCO5683 | -     | + | two-component system sensor kinase          |
| peak_061 | 6967646 | 3.6457 | intergenic | 172   | SCO6307 | -     | - | cyclase                                     |
| peak_061 | 6967646 | 3.6457 | internal   | -826  | SCO6308 | -     | - | hydrolase                                   |
| peak_071 | 457449  | 3.633  | intergenic | 35    | SCO0436 | rpmF  | + | 50S ribosomal protein L32                   |
| peak_085 | 5415283 | 3.5927 | intergenic | 41    | SCO4977 | -     | - | TetR family transcriptional regulator       |
| peak_050 | 3875941 | 3.554  | internal   | -1180 | SCO3507 | -     | + | integral membrane efflux protein            |
| peak_037 | 8224773 | 3.5521 | internal   | -4    | SCO7409 | -     | - | binding-protein dependent transport protein |
| peak_049 | 5542240 | 3.5336 | internal   | -32   | SCO5101 | -     | + | hypothetical protein                        |
| peak_098 | 5542240 | 3.5336 | intergenic | 235   | SCO5102 | -     | + | mutT-like protein                           |
| peak_137 | 8506269 | 3.5171 | intergenic | 14    | SCO7682 | -     | + | non-ribosomal peptide synthase              |
| peak_161 | 8506269 | 3.5171 | intergenic | 147   | SCO7681 | -     | - | AMP-binding ligase                          |
| peak_048 | 6237127 | 3.5143 | intergenic | 398   | SCO5717 | -     | - | hypothetical protein                        |
| peak_048 | 6237127 | 3.5143 | intergenic | 81    | SCO5718 | -     | + | hypothetical protein                        |
| peak_063 | 4135002 | 3.4911 | intergenic | 6     | SCO3761 | -     | - | hypothetical protein                        |
| peak_027 | 1742190 | 3.4381 | intergenic | 23    | SCO1627 | cvnD9 | - | ATP-GTP binding protein                     |
| peak_045 | 7520580 | 3.4336 | intergenic | 136   | SCO6764 | -     | + | squalene-hopene cyclase                     |
| peak_062 | 7520580 | 3.4336 | internal   | -1117 | SCO6763 | -     | + | polyprenyl synthetase                       |
| peak_104 | 1298023 | 3.4166 | internal   | -2308 | SCO1226 | -     | - | hypothetical protein                        |
| peak_074 | 310453  | 3.406  | internal   | -75   | SCO0313 | -     | + | transmembrane transport protein             |

|          |         |        |            |       |         |      |   |                                            |
|----------|---------|--------|------------|-------|---------|------|---|--------------------------------------------|
| peak_020 | 4304413 | 3.3977 | internal   | -155  | SCO3908 | rpsR | + | 30S ribosomal protein S18                  |
| peak_164 | 4304413 | 3.3977 | intergenic | 100   | SCO3909 | rplI | + | 50S ribosomal protein L9                   |
| peak_138 | 7495394 | 3.3126 | internal   | -1525 | SCO6739 | -    | + | BCCT family transporter                    |
| peak_149 | 8498830 | 3.3078 | internal   | -418  | SCO7675 | -    | + | hypothetical protein                       |
| peak_161 | 8498830 | 3.3078 | intergenic | 231   | SCO7676 | fdx3 | + | Fdx3; ferredoxin                           |
| peak_039 | 4988778 | 3.2929 | internal   | -767  | SCO4569 | nuoH | + | NADH dehydrogenase subunit H               |
| peak_145 | 7829456 | 3.277  | internal   | -2846 | SCO7037 | -    | + | hypothetical protein                       |
| peak_028 | 3906872 | 3.2578 | intergenic | 397   | SCO3539 | -    | + | transposase                                |
| peak_075 | 3906872 | 3.2578 | intergenic | 71    | SCO3538 | -    | - | hypothetical protein                       |
| peak_105 | 5221376 | 3.2013 | internal   | -1530 | SCO4798 | -    | - | peptidase                                  |
| peak_003 | 7376994 | 3.1576 | internal   | -633  | SCO6641 | -    | - | hypothetical protein                       |
| peak_032 | 4067752 | 3.1549 | intergenic | 358   | SCO3684 | -    | - | hypothetical protein                       |
| peak_032 | 4067752 | 3.1549 | intergenic | 15    | SCO3685 | -    | + | hypothetical protein                       |
| peak_104 | 1215993 | 3.1531 | intergenic | 66    | SCO1154 | -    | - | hypothetical protein                       |
| peak_061 | 6986846 | 3.1424 | intergenic | 82    | SCO6325 | -    | - | hypothetical protein                       |
| peak_158 | 6986846 | 3.1424 | internal   | -396  | SCO6326 | -    | - | hypothetical protein                       |
| peak_022 | 8579982 | 3.1002 | intergenic | 74    | SCO7747 | -    | + | hypothetical protein                       |
| peak_116 | 1448947 | 3.0809 | internal   | -666  | SCO1372 | -    | - | hypothetical protein                       |
| peak_014 | 1052470 | 3.0623 | intergenic | 183   | SCO0997 | -    | + | Fe uptake system integral membrane protein |
| peak_129 | 1052470 | 3.0623 | internal   | -857  | SCO0996 | -    | + | lipoprotein                                |
| peak_057 | 7971873 | 3.0446 | internal   | -2161 | SCO7173 | -    | + | transcriptional regulator                  |
| peak_002 | 5177153 | 3.037  | internal   | -48   | SCO4764 | -    | - | dehydrogenase                              |
| peak_139 | 5138239 | 3.0202 | internal   | -584  | SCO4722 | secY | + | preprotein translocase subunit SecY        |
| peak_091 | 6810573 | 2.9531 | internal   | -1774 | SCO6198 | -    | + | hypothetical protein                       |
| peak_067 | 145377  | 2.9432 | intergenic | 11    | SCO0154 | -    | - | hypothetical protein                       |
| peak_086 | 145377  | 2.9432 | intergenic | 122   | SCO0155 | -    | + | transcriptional regulator                  |
| peak_040 | 6155367 | 2.9409 | internal   | -79   | SCO5655 | -    | - | hypothetical protein                       |

|          |         |        |            |      |         |      |   |                                           |
|----------|---------|--------|------------|------|---------|------|---|-------------------------------------------|
| peak_105 | 5222983 | 2.9098 | intergenic | 77   | SCO4798 | -    | - | lipase                                    |
| peak_029 | 4990924 | 2.9095 | intergenic | 325  | SCO4573 | nuoL | + | NADH dehydrogenase subunit L              |
| peak_115 | 4990924 | 2.9095 | intergenic | 11   | SCO4572 | nuoK | + | NADH dehydrogenase subunit K              |
| peak_126 | 4990924 | 2.9095 | internal   | -843 | SCO4571 | nuoJ | + | NADH dehydrogenase subunit J              |
| peak_106 | 7689045 | 2.9079 | internal   | -3   | SCO6925 | -    | - | hypothetical protein                      |
| peak_055 | 6292782 | 2.9029 | internal   | -371 | SCO5754 | -    | + | hypothetical protein                      |
| peak_059 | 6292782 | 2.9029 | intergenic | 284  | SCO5755 | -    | + | hypothetical protein                      |
| peak_164 | 4457547 | 2.893  | internal   | -379 | SCO4067 | dnaZ | + | DNA polymerase III subunits gamma and tau |
| peak_006 | 6808501 | 2.8839 | intergenic | 298  | SCO6198 | -    | + | hypothetical protein                      |
| peak_144 | 6808501 | 2.8839 | intergenic | 279  | SCO6197 | -    | - | peptidase                                 |
| peak_068 | 1179004 | 2.8827 | internal   | -710 | SCO1120 | -    | + | hydrolase                                 |
| peak_159 | 1179004 | 2.8827 | intergenic | 90   | SCO1121 | -    | + | secreted protein                          |
| peak_083 | 5446147 | 2.8811 | internal   | -251 | SCO5009 | -    | + | secretory protein                         |
| peak_021 | 5133444 | 2.875  | intergenic | 353  | SCO4714 | rplE | + | 50S ribosomal protein L5                  |
| peak_052 | 5133444 | 2.875  | internal   | -341 | SCO4712 | rplN | + | 50S ribosomal protein L14                 |
| peak_108 | 5133444 | 2.875  | intergenic | 30   | SCO4713 | rplX | + | 50S ribosomal protein L24                 |
| peak_001 | 8640121 | 2.8743 | internal   | -84  | SCO7821 | -    | + | hypothetical protein                      |
| peak_074 | 276945  | 2.8645 | internal   | -7   | SCO0285 | -    | + | sodium/proton antiporter                  |
| peak_086 | 232478  | 2.8581 | intergenic | 30   | SCO0244 | -    | + | hypothetical protein                      |
| peak_018 | 6474094 | 2.8342 | intergenic | 423  | SCO5908 | -    | + | hypothetical protein                      |
| peak_042 | 6474094 | 2.8342 | internal   | -488 | SCO5906 | -    | + | transcriptional regulator                 |
| peak_142 | 7954355 | 2.8106 | internal   | -306 | SCO7159 | -    | + | hypothetical protein                      |
| peak_162 | 8018431 | 2.7866 | internal   | -590 | SCO7214 | -    | - | hypothetical protein                      |
| peak_100 | 2929523 | 2.7858 | intergenic | 158  | SCOt18  | -    | + | tRNA-Arg                                  |
| peak_125 | 2929523 | 2.7858 | intergenic | 174  | SCO2685 | -    | - | ATP-binding protein                       |
| peak_031 | 4205012 | 2.7785 | intergenic | 212  | SCO3824 | -    | + | ABC transporter ATP-binding protein       |
| peak_103 | 4205012 | 2.7785 | internal   | -69  | SCO3823 | -    | - | quinone oxidoreductase                    |

|          |         |        |            |       |         |      |   |                                                               |
|----------|---------|--------|------------|-------|---------|------|---|---------------------------------------------------------------|
| peak_167 | 1363264 | 2.774  | intergenic | 40    | SCO1291 | -    | + | hypothetical protein                                          |
| peak_012 | 1923218 | 2.7522 | intergenic | 449   | SCO1792 | -    | - | 3-methyladenine DNA glycosylase                               |
| peak_078 | 1923218 | 2.7522 | internal   | -302  | SCO1793 | -    | + | Spo0M-homologous protein                                      |
| peak_034 | 1650335 | 2.7509 | intergenic | 150   | SCO1540 | -    | - | hypothetical protein                                          |
| peak_136 | 1650335 | 2.7509 | internal   | -24   | SCO1541 | -    | + | regulator                                                     |
| peak_092 | 3644512 | 2.7397 | intergenic | 349   | SCO3294 | -    | - | transferase                                                   |
| peak_092 | 3644512 | 2.7397 | internal   | -423  | SCO3295 | -    | - | oxidoreductase                                                |
| peak_057 | 7982615 | 2.7358 | internal   | -216  | SCO7182 | -    | + | branched-chain amino acid ABC transporter ATP-binding protein |
| peak_082 | 5449007 | 2.7293 | intergenic | 371   | SCO5012 | -    | + | hypothetical protein                                          |
| peak_084 | 5449007 | 2.7293 | internal   | -794  | SCO5011 | -    | + | hypothetical protein                                          |
| peak_073 | 1517280 | 2.7191 | intergenic | 104   | SCO1421 | -    | + | hypothetical protein                                          |
| peak_030 | 2689010 | 2.7103 | internal   | -894  | SCO2495 | -    | + | hypothetical protein                                          |
| peak_065 | 804719  | 2.7097 | internal   | -628  | SCO0759 | -    | + | hypothetical protein                                          |
| peak_065 | 804719  | 2.7097 | intergenic | 416   | SCO0760 | -    | + | methyltransferase                                             |
| peak_110 | 8436921 | 2.7059 | intergenic | 253   | SCO7610 | -    | + | transcriptional regulator                                     |
| peak_146 | 8436921 | 2.7059 | internal   | -53   | SCO7609 | -    | - | esterase                                                      |
| peak_119 | 7839183 | 2.7003 | intergenic | 137   | SCO7048 | -    | - | delta fatty acid desaturase                                   |
| peak_119 | 7839183 | 2.7003 | intergenic | 24    | SCO7049 | -    | + | glutaminase                                                   |
| peak_137 | 8552175 | 2.6866 | internal   | -245  | SCO7717 | -    | - | hypothetical protein                                          |
| peak_092 | 3648054 | 2.6667 | internal   | -494  | SCO3299 | -    | - | hypothetical protein                                          |
| peak_160 | 5829642 | 2.6435 | intergenic | 378   | SCO5359 | rpmE | + | 50S ribosomal protein L31                                     |
| peak_169 | 5829642 | 2.6435 | internal   | -895  | SCO5358 | -    | + | hypothetical protein                                          |
| peak_101 | 1143560 | 2.6291 | internal   | -5    | SCO1082 | -    | - | electron transfer flavoprotein subunit beta                   |
| peak_041 | 7292023 | 2.6279 | internal   | -243  | SCO6582 | -    | - | hypothetical protein                                          |
| peak_087 | 2107213 | 2.6053 | intergenic | 14    | SCO1966 | -    | - | excinuclease ABC subunit B                                    |
| peak_151 | 6816835 | 2.5997 | internal   | -1338 | SCO6201 | -    | + | glyoxylate carboligase                                        |
| peak_122 | 6202094 | 2.5994 | internal   | -274  | SCO5693 | -    | + | acyl CoA dehydrogenase                                        |

|          |         |        |            |       |         |       |   |                                                    |
|----------|---------|--------|------------|-------|---------|-------|---|----------------------------------------------------|
| peak_116 | 1410198 | 2.5972 | internal   | -171  | SCO1333 | -     | + | hypothetical protein                               |
| peak_167 | 1410198 | 2.5972 | intergenic | 476   | SCO1332 | -     | - | hypothetical protein                               |
| peak_075 | 3876929 | 2.5837 | intergenic | 262   | SCO3508 | -     | + | maturase-like protein                              |
| peak_008 | 3123795 | 2.5827 | internal   | -116  | SCO2867 | -     | + | hypothetical protein                               |
| peak_113 | 3123795 | 2.5827 | intergenic | 119   | SCO2868 | -     | + | hypothetical protein                               |
| peak_043 | 5739777 | 2.5806 | internal   | -1279 | SCO5275 | -     | + | ATP/GTP binding protein                            |
| peak_114 | 860639  | 2.5768 | internal   | -676  | SCO0812 | -     | + | sugar isomerase                                    |
| peak_038 | 7591171 | 2.576  | internal   | -281  | SCO6826 | -     | - | hypothetical protein                               |
| peak_047 | 25009   | 2.5541 | intergenic | 488   | SCO0028 | -     | - | hypothetical protein                               |
| peak_047 | 25009   | 2.5541 | intergenic | 242   | SCO0030 | -     | + | hypothetical protein                               |
| peak_010 | 6900407 | 2.5427 | internal   | -1237 | SCO6272 | -     | + | FAD-binding protein                                |
| peak_007 | 5561003 | 2.536  | internal   | -589  | SCO5114 | bldKC | + | ABC transporter integral membrane protein BldKC    |
| peak_007 | 5561003 | 2.536  | intergenic | 399   | SCO5115 | bldKD | + | ABC transporter intracellular ATPase subunit BldKD |
| peak_008 | 3096784 | 2.5321 | internal   | -1278 | SCO2836 | -     | + | glycosyl transferase                               |
| peak_135 | 64284   | 2.4666 | intergenic | 191   | SCO0072 | -     | - | hypothetical protein                               |
| peak_135 | 64284   | 2.4666 | intergenic | 321   | SCO0073 | -     | + | hypothetical protein                               |
| peak_109 | 4670524 | 2.4534 | internal   | -392  | SCO4258 | -     | + | hydrolytic protein                                 |
| peak_064 | 4667461 | 2.4531 | internal   | -385  | SCO4256 | -     | + | hydrolytic protein                                 |
| peak_109 | 4669011 | 2.4476 | internal   | -420  | SCO4257 | -     | + | hydrolytic protein                                 |
| peak_168 | 4621170 | 2.4314 | internal   | -79   | SCO4213 | -     | + | hypothetical protein                               |
| peak_093 | 2924383 | 2.4197 | intergenic | 91    | SCO2682 | -     | - | hypothetical protein                               |
| peak_051 | 5321689 | 2.4092 | internal   | -372  | SCO4887 | -     | + | sugar ABC transporter integral membrane protein    |
| peak_015 | 104769  | 2.3993 | internal   | -1141 | SCO0124 | -     | + | hypothetical protein                               |
| peak_067 | 104769  | 2.3993 | intergenic | 288   | SCO0125 | -     | + | oxidoreductase                                     |
| peak_010 | 6873779 | 2.3861 | intergenic | 70    | SCO6251 | -     | + | reductase                                          |
| peak_029 | 5009006 | 2.3857 | internal   | -519  | SCO4586 | -     | + | ABC transporter                                    |
| peak_026 | 2553566 | 2.379  | internal   | -1310 | SCO2383 | -     | + | hypothetical protein                               |

|          |         |        |            |       |         |      |   |                                                                              |
|----------|---------|--------|------------|-------|---------|------|---|------------------------------------------------------------------------------|
| peak_022 | 8563938 | 2.3757 | internal   | -313  | SCO7729 | -    | + | hypothetical protein                                                         |
| peak_099 | 8315573 | 2.3643 | internal   | -142  | SCO7502 | -    | - | LacI family transcriptional regulator                                        |
| peak_143 | 8315573 | 2.3643 | intergenic | 333   | SCO7503 | -    | + | extracellular solute-binding protein                                         |
| peak_152 | 652485  | 2.3617 | internal   | -883  | SCO0613 | arcA | + | arginine deiminase                                                           |
| peak_070 | 2406200 | 2.3358 | internal   | -258  | SCO2235 | -    | + | hypothetical protein                                                         |
| peak_070 | 2406200 | 2.3358 | intergenic | 2     | SCO2236 | -    | + | hypothetical protein                                                         |
| peak_096 | 2406200 | 2.3358 | intergenic | 319   | SCO2237 | -    | + | lyase                                                                        |
| peak_147 | 2406200 | 2.3358 | intergenic | 432   | SCO2234 | glnE | - | bifunctional glutamine-synthetase<br>adenylyltransferase/deadenyltransferase |
| peak_065 | 791520  | 2.3353 | internal   | -15   | SCO0749 | -    | - | dehydratase                                                                  |
| peak_148 | 4608672 | 2.3326 | internal   | -113  | SCO4200 | -    | + | hypothetical protein                                                         |
| peak_018 | 6603031 | 2.3242 | internal   | -521  | SCO6020 | -    | - | transcriptional regulator                                                    |
| peak_094 | 2768537 | 2.3235 | internal   | -7    | SCO2565 | -    | - | hypothetical protein                                                         |
| peak_154 | 2768537 | 2.3235 | intergenic | 259   | SCO2564 | -    | - | DNA-binding protein                                                          |
| peak_020 | 4274048 | 2.3204 | internal   | -16   | SCO3883 | -    | + | inner membrane protein translocase component YidC                            |
| peak_088 | 3204771 | 2.3182 | intergenic | 124   | SCO2948 | -    | - | hypothetical protein                                                         |
| peak_088 | 3204771 | 2.3182 | intergenic | 101   | SCO2949 | murA | + | UDP-N-acetylglucosamine 1-carboxyvinyltransferase                            |
| peak_124 | 3467692 | 2.3135 | internal   | -1767 | SCO3166 | -    | - | membrane transport protein                                                   |
| peak_112 | 75766   | 2.3078 | internal   | -110  | SCO0088 | -    | - | beta-lactamase                                                               |
| peak_112 | 75766   | 2.3078 | intergenic | 90    | SCO0089 | -    | + | transcriptional regulator                                                    |
| peak_069 | 5075936 | 2.3075 | internal   | -663  | SCO4651 | -    | + | lipoprotein                                                                  |
| peak_072 | 2479602 | 2.2996 | internal   | -39   | SCO2309 | -    | - | transmembrane transport protein                                              |
| peak_072 | 2479602 | 2.2996 | intergenic | 315   | SCO2310 | -    | + | integral membrane efflux protein                                             |
| peak_065 | 703925  | 2.2923 | internal   | -175  | SCO0665 | -    | + | hypothetical protein                                                         |
| peak_065 | 703925  | 2.2923 | intergenic | 189   | SCO0666 | catB | + | catalase                                                                     |
| peak_055 | 6253563 | 2.2855 | internal   | -3809 | SCO5734 | -    | - | ATP/GTP binding protein membrane protein                                     |
| peak_077 | 6253563 | 2.2855 | intergenic | 228   | SCO5733 | -    | - | hypothetical protein                                                         |
| peak_013 | 7718901 | 2.278  | internal   | -540  | SCO6953 | -    | - | hypothetical protein                                                         |

|          |         |        |            |       |         |       |   |                                                       |
|----------|---------|--------|------------|-------|---------|-------|---|-------------------------------------------------------|
| peak_052 | 5123915 | 2.2683 | internal   | -60   | SCO4699 | -     | + | Rhs protein                                           |
| peak_015 | 79753   | 2.263  | intergenic | 51    | SCO0095 | -     | - | hypothetical protein                                  |
| peak_058 | 7877768 | 2.2626 | internal   | -1813 | SCO7090 | -     | - | hypothetical protein                                  |
| peak_074 | 269393  | 2.2561 | intergenic | 390   | SCO0278 | -     | + | MutT domain-containing protein                        |
| peak_150 | 269393  | 2.2561 | internal   | -295  | SCO0277 | -     | - | hypothetical protein                                  |
| peak_025 | 3602351 | 2.2515 | intergenic | 273   | SCO3248 | fabF3 | - | 3-oxoacyl-ACP synthase                                |
| peak_025 | 3602351 | 2.2515 | intergenic | 31    | SCO3249 | -     | - | acyl carrier protein                                  |
| peak_053 | 3602351 | 2.2515 | intergenic | 258   | SCOt27  | -     | + | tRNA-Arg                                              |
| peak_172 | 8045120 | 2.2431 | internal   | -369  | SCO7236 | qcrB3 | - | ubiquinol-cytochrome C reductase cytochrome subunit B |
| peak_132 | 2418880 | 2.238  | internal   | -127  | SCO2251 | -     | + | hypothetical protein                                  |
| peak_060 | 58507   | 2.232  | internal   | -2282 | SCO0069 | -     | + | hypothetical protein                                  |
| peak_117 | 6783780 | 2.2144 | internal   | -31   | SCO6178 | -     | - | deacetylase                                           |
| peak_117 | 6783780 | 2.2144 | intergenic | 203   | SCO6179 | -     | + | nucleotide-sugar dehydratase                          |
| peak_036 | 7550869 | 2.208  | internal   | -1408 | SCO6790 | -     | + | long chain fatty acid CoA ligase                      |
| peak_002 | 5212045 | 2.1943 | intergenic | 123   | SCO4790 | -     | - | hypothetical protein                                  |
| peak_128 | 5212045 | 2.1943 | intergenic | 68    | SCO4791 | -     | + | two-component system sensor kinase                    |
| peak_102 | 3603229 | 2.1855 | internal   | -678  | SCO3250 | -     | - | integrase                                             |
| peak_130 | 2672012 | 2.1778 | intergenic | 71    | SCO2481 | -     | - | hypothetical protein                                  |
| peak_170 | 2672012 | 2.1778 | intergenic | 37    | SCO2482 | -     | + | dehydrogenase                                         |
| peak_078 | 2000049 | 2.174  | internal   | -939  | SCO1865 | -     | + | diaminobutyrate--2-oxoglutarate aminotransferase      |
| peak_134 | 2000049 | 2.174  | intergenic | 451   | SCO1866 | ectC  | + | L-ectoine synthase                                    |
| peak_166 | 2074770 | 2.1729 | internal   | -433  | SCO1941 | -     | - | hypothetical protein                                  |
| peak_153 | 3842242 | 2.1423 | internal   | -1140 | SCO3479 | -     | - | beta-galatosidase                                     |
| peak_127 | 5566590 | 2.1402 | internal   | -131  | SCO5119 | -     | + | peptide transport system integral membrane protein    |
| peak_089 | 5698082 | 2.1291 | intergenic | 6     | SCO5236 | nagB  | - | glucosamine-6-phosphate deaminase                     |
| peak_148 | 4543587 | 2.1281 | internal   | -724  | SCO4129 | -     | - | hypothetical protein                                  |
| peak_111 | 365629  | 2.1221 | intergenic | 78    | SCO0360 | -     | - | Lacl family DNA-binding transcriptional repressor     |



|          |         |        |            |       |         |       |   |                                         |
|----------|---------|--------|------------|-------|---------|-------|---|-----------------------------------------|
| peak_111 | 365629  | 2.1221 | internal   | -1166 | SCO0361 | -     | - | hypothetical protein                    |
| peak_141 | 3335815 | 2.1216 | internal   | -946  | SCO3045 | -     | + | hypothetical protein                    |
| peak_088 | 3183027 | 2.1216 | internal   | -615  | SCO2931 | -     | + | ABC transporter ATP-binding protein     |
| peak_054 | 7736044 | 2.1178 | intergenic | 63    | SCO6969 | -     | + | hypothetical protein                    |
| peak_056 | 7736044 | 2.1178 | internal   | -1535 | SCO6968 | -     | + | long-chain-fatty-acid-CoA ligase        |
| peak_005 | 6467391 | 2.1085 | internal   | -1764 | SCO5900 | -     | + | hypothetical protein                    |
| peak_005 | 6467391 | 2.1085 | intergenic | 364   | SCO5901 | -     | + | RNA methyltransferase                   |
| peak_042 | 6470959 | 2.0872 | internal   | -2493 | SCO5905 | -     | - | export protein                          |
| peak_090 | 6470959 | 2.0872 | intergenic | 85    | SCO5904 | -     | - | hypothetical protein                    |
| peak_079 | 3424042 | 2.0572 | internal   | -53   | SCO3123 | prsA2 | + | ribose-phosphate pyrophosphokinase      |
| peak_140 | 8475943 | 2.0571 | intergenic | 62    | SCO7648 | -     | - | two-component system response regulator |
| peak_107 | 7705183 | 2.0461 | internal   | -6    | SCO6940 | cvnD8 | - | ATP/GTP binding protein                 |
| peak_118 | 3402026 | 2.0455 | intergenic | 224   | SCO3104 | -     | - | hypothetical protein                    |
| peak_118 | 3402026 | 2.0455 | internal   | -127  | SCO3105 | -     | + | hypothetical protein                    |
| peak_076 | 8378969 | 2.0397 | internal   | -268  | SCO7556 | -     | + | sugar transport permease                |
| peak_044 | 8357292 | 2.0336 | internal   | -1753 | SCO7536 | -     | + | hypothetical protein                    |
| peak_001 | 8652981 | 2.0226 | intergenic | 73    | SCO7835 | -     | + | hypothetical protein                    |
| peak_166 | 2062048 | 2.0006 | internal   | -143  | SCO1930 | -     | + | integral membrane transport protein     |
| peak_004 | 5353579 | 1.9989 | internal   | -992  | SCO4919 | -     | + | flavoprotein disulfide reductase        |
| peak_013 | 7705714 | 1.9961 | internal   | -450  | SCO6942 | cvnB8 | - | hypothetical protein                    |
| peak_080 | 7705714 | 1.9961 | intergenic | 62    | SCO6941 | cvnC8 | - | hypothetical protein                    |
| peak_136 | 1721542 | 1.9915 | internal   | -919  | SCO1610 | -     | - | hypothetical protein                    |
| peak_130 | 2636293 | 1.9865 | internal   | -3498 | SCO2450 | -     | + | Ser/Thr protein kinase (regulator)      |
| peak_046 | 4270021 | 1.9825 | intergenic | 178   | SCO3878 | dnaN  | - | DNA polymerase III subunit beta         |
| peak_145 | 7809078 | 1.9732 | intergenic | 146   | SCO7023 | -     | + | hypothetical protein                    |
| peak_160 | 5863144 | 1.9716 | internal   | -412  | SCO5394 | -     | - | ABC transporter                         |
| peak_066 | 7650506 | 1.9684 | internal   | -825  | SCO6881 | -     | - | ATP-binding protein                     |

|          |         |        |            |      |         |   |   |                                                               |
|----------|---------|--------|------------|------|---------|---|---|---------------------------------------------------------------|
| peak_120 | 7841298 | 1.9639 | internal   | -105 | SCO7050 | - | - | D-alanyl-D-alanine carboxypeptidase                           |
| peak_033 | 8318793 | 1.945  | intergenic | 381  | SCO7506 | - | + | hydrolase                                                     |
| peak_143 | 8318793 | 1.945  | internal   | -584 | SCO7505 | - | + | integral membrane binding-protein-dependent transport protein |
| peak_036 | 7533909 | 1.9292 | intergenic | 193  | SCO6776 | - | + | hypothetical protein                                          |
| peak_045 | 7533909 | 1.9292 | intergenic | 40   | SCO6775 | - | - | transcriptional regulator                                     |
| peak_114 | 1047957 | 1.9265 | internal   | -846 | SCO0992 | - | + | cysteine synthase                                             |
| peak_129 | 1047957 | 1.9265 | intergenic | 173  | SCO0993 | - | + | hypothetical protein                                          |
| peak_133 | 14477   | 1.8949 | intergenic | 454  | SCO0011 | - | - | hypothetical protein                                          |
| peak_133 | 14477   | 1.8949 | intergenic | 23   | SCO0012 | - | - | hypothetical protein                                          |
| peak_004 | 5354818 | 1.8837 | internal   | -589 | SCO4920 | - | + | DeoR family transcriptional regulator                         |
| peak_097 | 3165087 | 1.8588 | internal   | -187 | SCO2914 | - | - | amino acid permease                                           |

From 3 sites **TGaaAatgatTttCA** (Shin *et al.*, 2007)  
 From 6 sites **ATGAaNNTCaTTTTCA** (Kallifidas *et al.*, 2010)

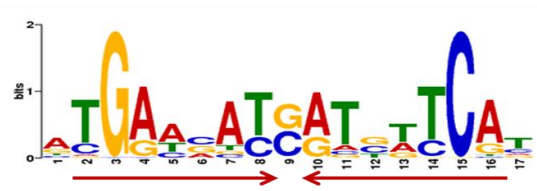

**tGaNNatSatNNtCa** (This study)

***zitB*** TGACAACGGTGTTCA

**Actinobacterial**  
***znuA*** taaTGaNAANNNTTNTcANta (Schroder *et al.*, 2010)

**Supplementary Figure 1. Comparison of Zur-binding consensus sequences.** The Zurbox consensus sequences determined from three Zur-bound sites (Shin *et al.* 2007)<sup>1</sup>, from 6 bound sites (Kallifidas *et al.*, 2010)<sup>2</sup>, and this study (172 sites, E-value of 3.9e-233). The *zitB* Zurbox sequence was shown below, along with computational Zur-box consensus obtained from *znuA* genes of 17 actinobacterial genomes (Schroder *et al.*, 2010)<sup>3</sup>.

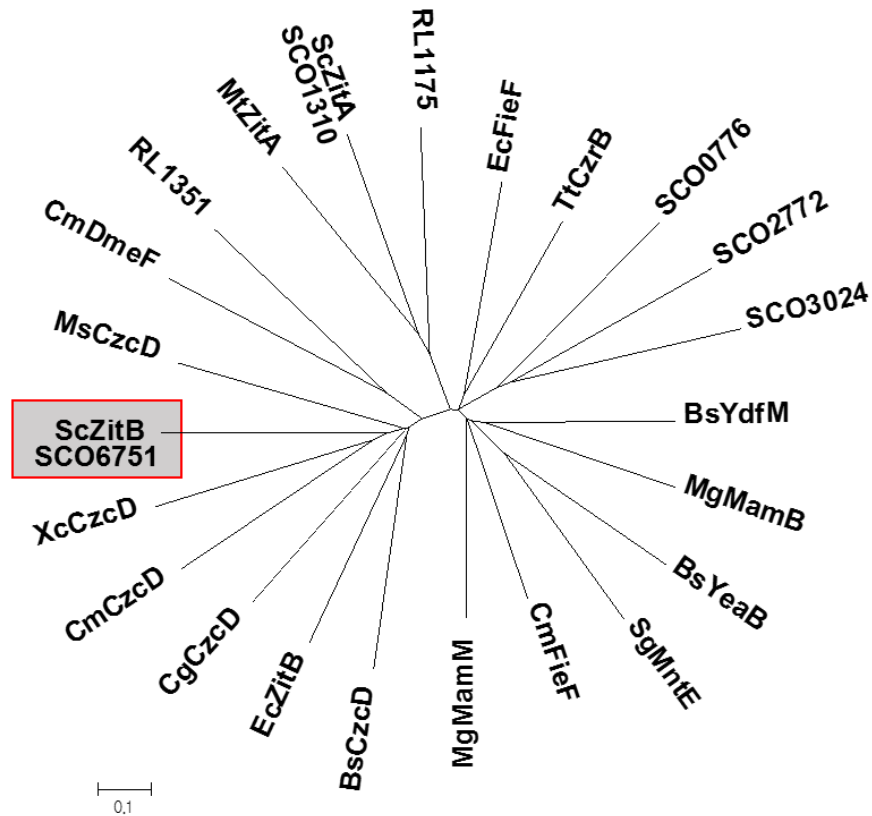

**Supplementary Figure 2. Phylogenetic relationship of SCO6751 with other bacterial CDF-type transporters.** We compared the sequence of SCO6751 with those of several CDF-type efflux pumps of reported functions. The selected ones include  $Zn^{2+}/Cd^{2+}/Fe^{2+}$  exporter FieF of *E. coli*,  $Zn^{2+}/Cd^{2+}/Ni^{2+}/Cu^{2+}$  exporter ZitB of *E. coli*, and others such as ZitA of *Mycobacterium tuberculosis*, CzrB of *Thermus thermophilus*, MamM of *Magnetospirillum. gryphiswaldense* MSR-1, Czcds of *B. subtilis* and *M. tuberculosis*<sup>4, 5, 6, 7, 8</sup>. These sequences were aligned with Clustal W algorithm and visualized with MEGA7 software. Abbreviations and sequence sources are as follows. From *B. subtilis*, BsCzcd<sup>9</sup> (NP\_390542), BsYdfM<sup>10</sup> (NP\_388428), BsYeaB<sup>11</sup> (NP\_388513) ; from *Corynebacterium glutamicum*, CgCzcd<sup>12</sup> (NP\_600503); from *Cupriavidus metallidurans*, CmCzcd<sup>13</sup> (CAA67085), CmDmeF<sup>14</sup> (ABF07084), CmFieF<sup>14</sup> (ABF10278); from *E. coli*, EcFieF (NP\_418350), EcZitB(NP\_415273); from *M. gryphiswaldense*, MgMamB<sup>15</sup> (CDK99583),

MgMamM<sup>15</sup> (CAJ30120); from *M. smegmatis*, MsCzcD<sup>16</sup> (YP\_885161); from *M. tuberculosis H37Rv*, MtZitA<sup>17</sup> (NP\_216541); from *Rhizobium leguminosarum*, RL1175<sup>18</sup> (CAK06672), RL1351<sup>18</sup> (CAK06848); from *S. coelicolor A3(2)*, SCO0776 (NP\_625078), SCO2772(NP\_627002), SCO3024 (NP\_627246), SCO1310 (NP\_625596), SCO6751 (ScZitB; NP\_630824); from *T. thermophiles*, TtCzrB<sup>19</sup> (CAC83722); from *Xanthomonas campestris*, XcCzcD<sup>20</sup> (WP\_011036459).

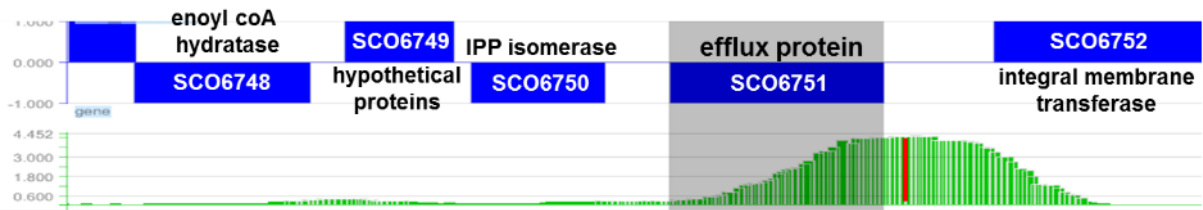

**Supplementary Figure 3. The location of Zur-box on the *zitB* gene relative to the transcription start site (TSS).** The ChIP-chip data for Zur binding near the SCO6751 gene. The position of Zur-box motif was shown in red in the middle of a broad peak of Zur-bound DNAs (green).

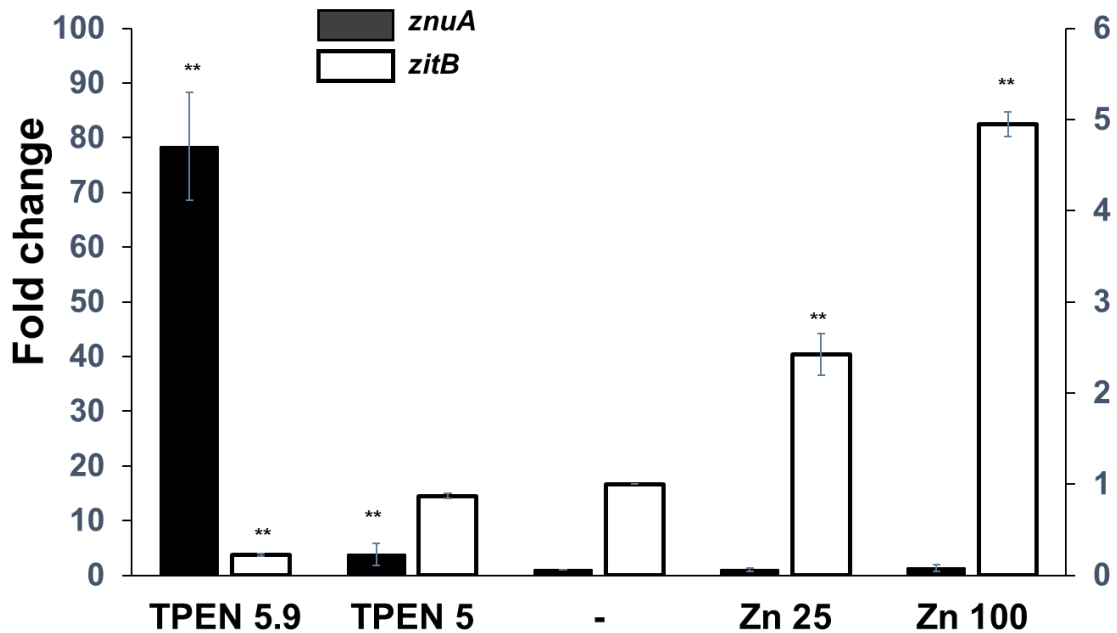

**Supplementary Figure 4. Quantification of the *znuA* and *zitB* RNAs by qRT-PCR.**

The same RNA samples that were used in S1 mapping were evaluated by qRT-PCR. The forward (5'-GAACGTACGACGACGCCGCA-3') and reverse (5'-CCGAGCTGTGCTGGAGCAG-3') primers were used to for *znuA*. The forward (5'-GGTACACACGAGGAGGCGGC-3') and reverse (5'-GTGATCGACAGCGCCACGCG-3') primers were used to for *zitB*. The qRT-PCR values were normalized to the constant reference gene (SCO0710)<sup>21</sup>, and were presented as relative fold changes, by taking the untreated sample values as 1.0. Three independent RNA samples were obtained for qPCR analysis, using the Stratagene MX3000P QPCR system (Agilent Technologies). Average values with standard deviations (error bars) were presented. Asterisks (\*\*) indicate measurements with P-values  $\leq 0.001$  by Student's t-test.

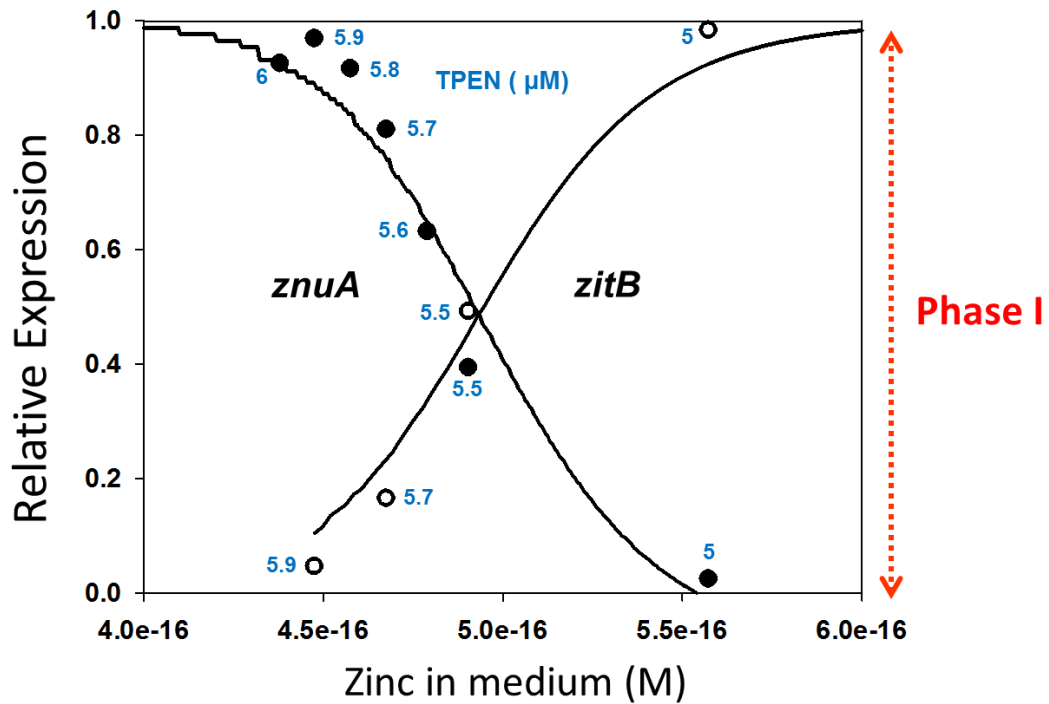

**Supplementary Figure 5. The zinc-dependent expression of the *zitB* and *znuA* gene at sub-femtomolar range of zinc concentrations.** For both genes, the maximal level of expression was taken as 1.0 for cells treated with TPEN (from 5 to 6 μM) in YEME medium. For the *zitB* gene, the maximal level of expression at phase I activation range occurred when TPEN was treated at 5 μM.



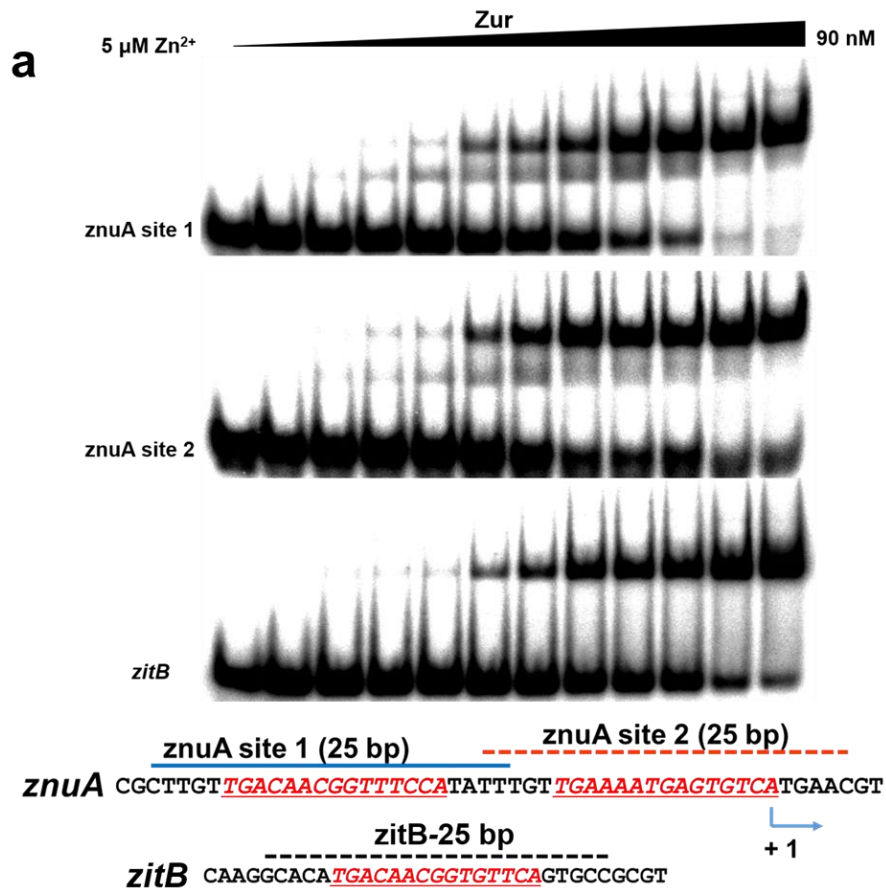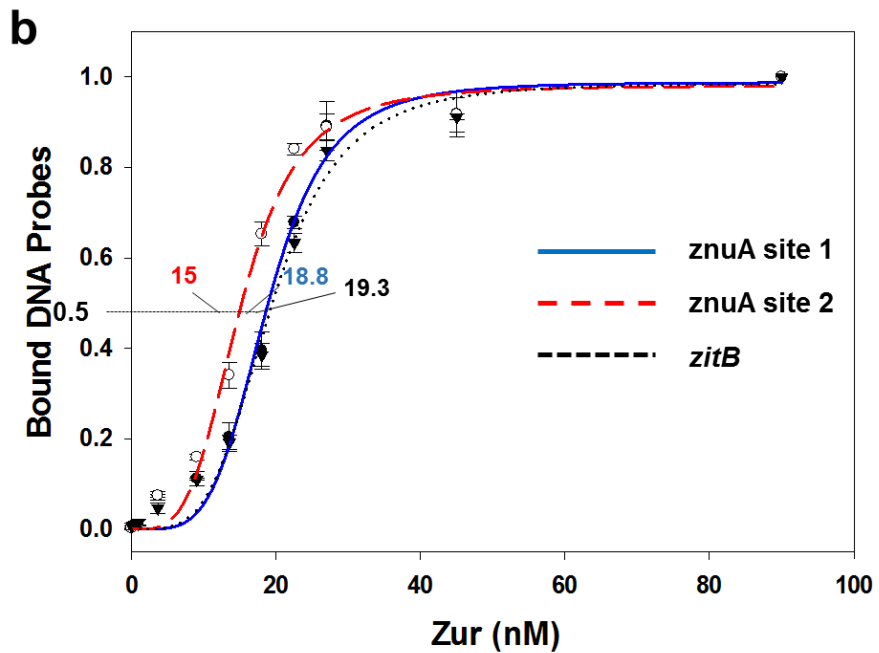

**Supplementary Figure 6. Binding of Zur to 25 bp DNA probes containing the core Zur-box motifs (in red italic) of the *znuA* (site 1 and site 2) or *zitB* promoters.** (a) EMSA between Zur and 25 bp DNA probes. Increasing amounts of purified Zur protein (0.9, 1.8, 2.7, 3.6, 9, 13.5, 18, 22.5, 27, 45 and 90 nM) were incubated in the presence of 5  $\mu$ M ZnSO<sub>4</sub> with  $\gamma$ -<sup>32</sup>P labeled synthetic DNA probes for *zitB*, *znuA* site1 and *znuA* site2 as indicated at the bottom. (b) The binding curves (Hill plots) were generated from EMSA data for the *znuA* site 1 (filled circle, blue line), *znuA* site 2 (open circle, red dotted line), and *zitB* (filled triangle, black dotted line) probes. The K<sub>d</sub> values were estimated to be 18.8, 15, and 19.3 nM for *znuA* site 1, *znuA* site 2, and *zitB*, respectively. Average values from three independent experiments were presented with standard deviations.

**a** *zitB* promoter upstream

- 228 gacaaaccgcgccccagaccgggcatcgcggacatcgcacagtgtccgccgttgt  
 - 172 tcgcacaggggtcaggacgagccccgtcggaccgggtccccctgacggcggaagccgc  
 - 116 accctccgcatcctcgcaacactctgacctgcgaaacgtttccgcagggtcaaggca  
 - 60 catgacaacgggtgttcaagtgcgcggttgcccgataccccctacccgtagttgactg  
 + 1  
 - 4 gcatccg

**b**

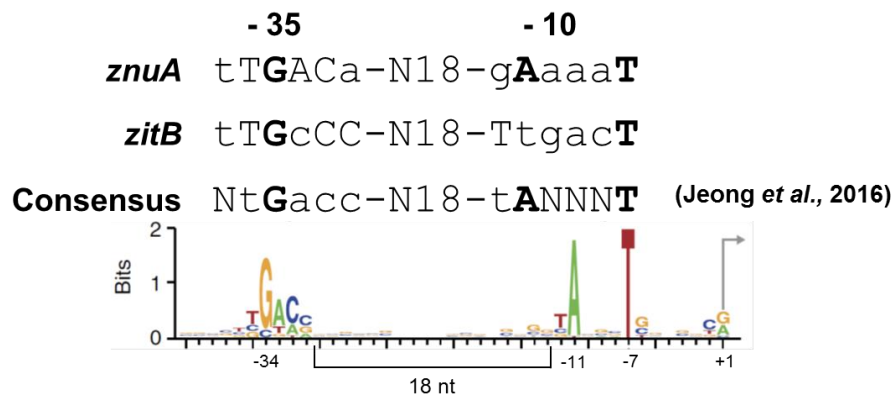

**Supplementary Figure 7. Sequence features of the *zitB* promoter region. (a)**

Promoter upstream sequences of the *zitB* gene. **(b)** Comparison of the -35 and -10 elements of the *zitB* promoter with those of *znuA* and the prominent promoters, whose transcription start sites (TSS) have been determined in the genome of *S. coelicolor*<sup>22</sup>. The bold capitals denote most conserved nucleotides. The nucleotide positions in the prominent promoter consensus logo were numbered based on the most frequently observed distances from the TSS<sup>22</sup>.

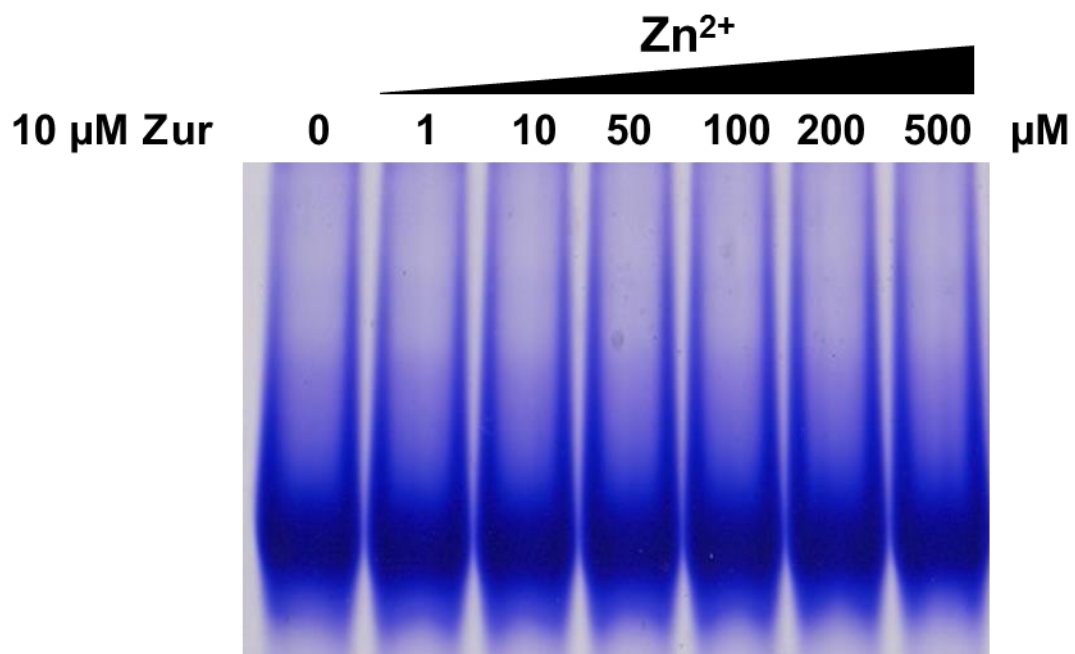

**Supplementary Figure 8. Constant electrophoretic mobility of Zur on native PAGE over a wide range of zinc concentration changes.** Increasing amounts of zinc (0 to 0.5 mM) were added to 10  $\mu M$  Zur in the binding buffer, whose electrophoretic mobility change was examined on 5 % native PAGE.

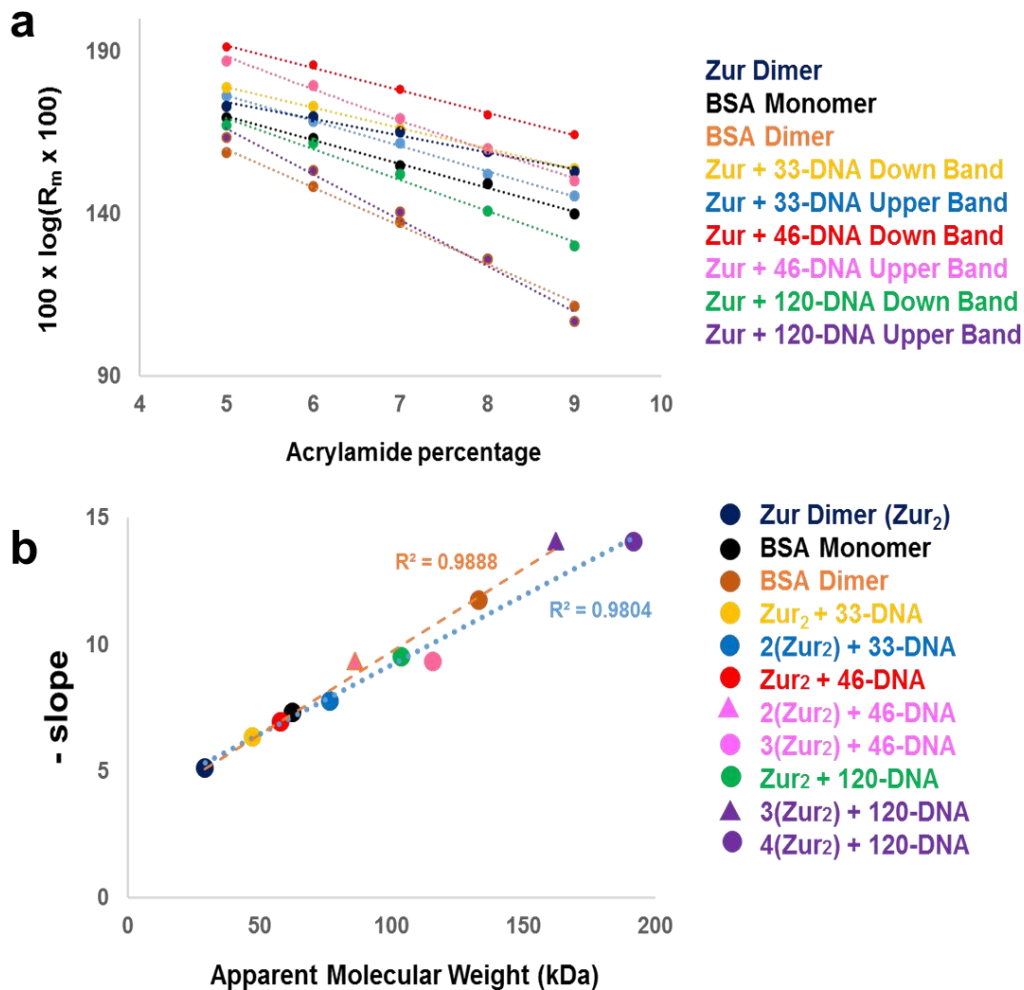

**Supplementary Figure 9. Determination of the stoichiometry of Zur-DNA complexes by native PAGE mobility.** (a) Relative mobility of Zur-DNA complexes on DNA probes of 33, 46, or 120 bp probes on native PAGE on 5 to 9% polyacrylamide gels. Logarithms of relative mobility values (compared with bromophenol blue) of both upper and down complexes as well as standard proteins (BSA monomer, BSA dimer, Zur dimer) were plotted against acrylamide percentages as described by Baichoo and Helmann (2002)<sup>23</sup>. Data points for each complex and standard protein were presented with color-coded legends. (b) Estimation of molecular mass and the stoichiometry of Zur-DNA complex. The negative slope of the mobility change for each standard protein was re-plotted

against their molecular weights to obtain a standard curve. The apparent molecular weight of each complex was estimated from the standard curve using the least squares regression. The best fitting line ( $R^2$  of 0.9888; brown dotted line) was obtained by assuming the following stoichiometry of Zur for upper and down complex bands, respectively: On 33 bp DNA, tetrameric (47.2 kDa, blue) and dimeric (76.6 kDa, orange) Zur binding; on 46 bp DNA, tetrameric (86.3 kDa, pink triangle) and dimeric (57.9 kDa, red circle) Zur binding; On 120 bp probe, hexameric (162.4 kDa, purple triangle) and dimeric (103.6 kDa, green circle) binding. Another linear regression of data plots gave reasonably well-fitting curve ( $R^2$  of 0.9804; blue dotted line), when the upper bands on longer probes (46 bp and 120 bp) were regarded as hexameric (115.7 kDa with 46 bp DNA; pink circle) and octameric (191.8 kDa with 120 bp DNA; purple circle) Zur-bound complexes, respectively.

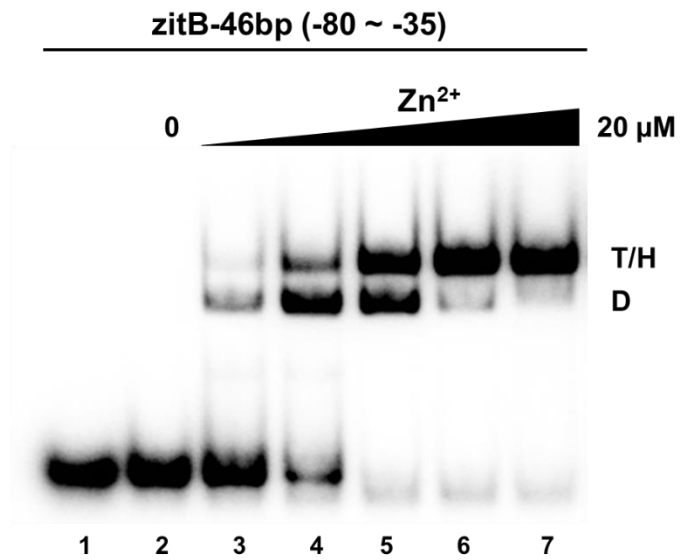

**Supplementary Figure 10. Binding of Zur to 46 bp DNA (from -80 to -35).** EMSA assay was performed for the binding reactions containing increasing amounts of zinc (0, 0.5, 1, 5, 10, 20  $\mu$ M) and 90 nM Zur. The upper and down complexes were labeled as T/H for tetramer or hexamer, and D for dimer, as estimated from the PAGE analysis on different acrylamide percentages (Supplementary Fig. 9).

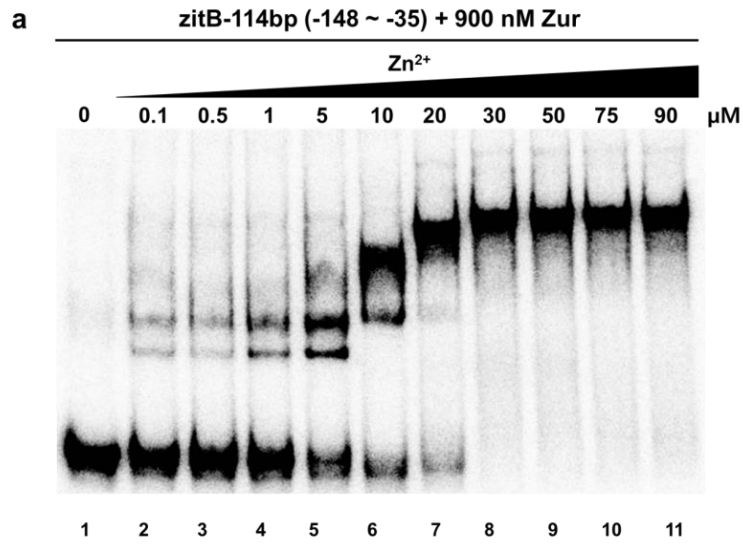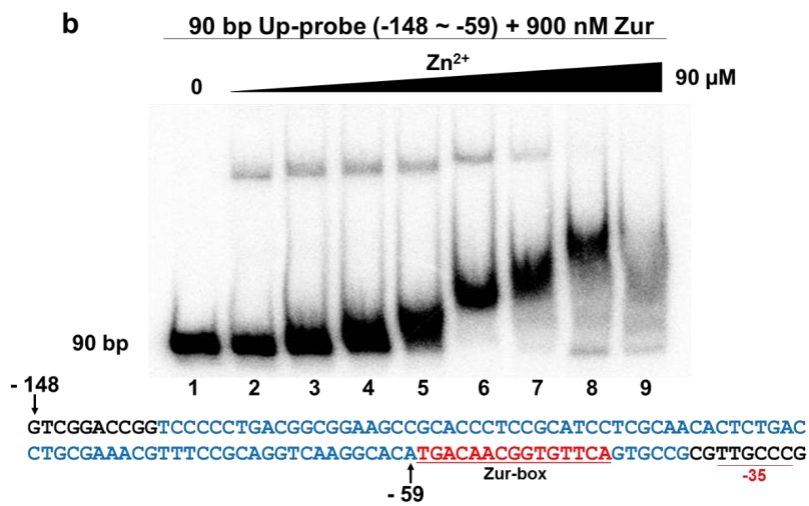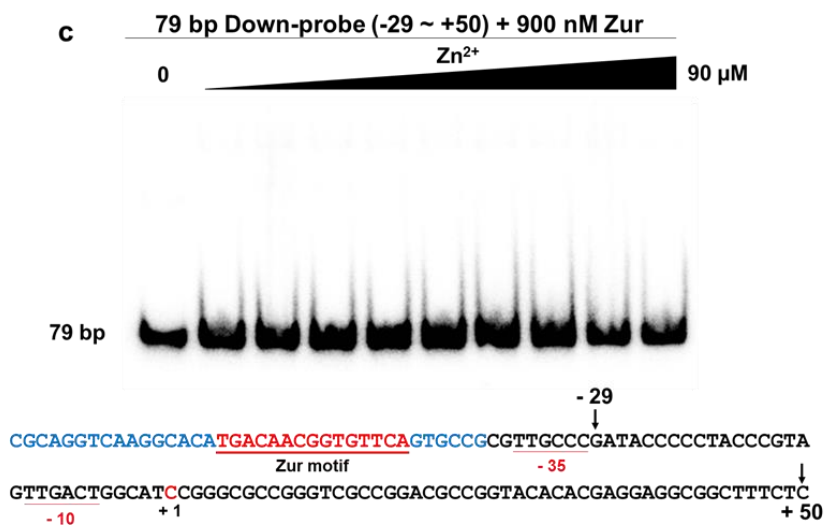



**Supplementary Figure 11. Zinc-dependent binding of Zur to 114 bp *zitB* probe at high concentration of Zur (900 nM).** (a) EMSA of Zur binding to 114 bp probe (from -148 to -35 nt from TSS) at 900 nM Zur with increasing concentrations of zinc (0.1, 0.5, 1, 5, 10, 20, 30, 50, 75, 90  $\mu$ M) in the binding reaction. Formation of super-shifted bands appear at  $>10$   $\mu$ M zinc. (b) EMSA of Zur binding (900 nM) to upstream DNA probe (-148 to -59) devoid of Zur-box motif. The same binding conditions as in (a) were used. (c) EMSA of Zur binding (900 nM) to downstream DNA probe (-29 to +50) devoid of Zur-box motif. The same binding conditions as in (a) were used.

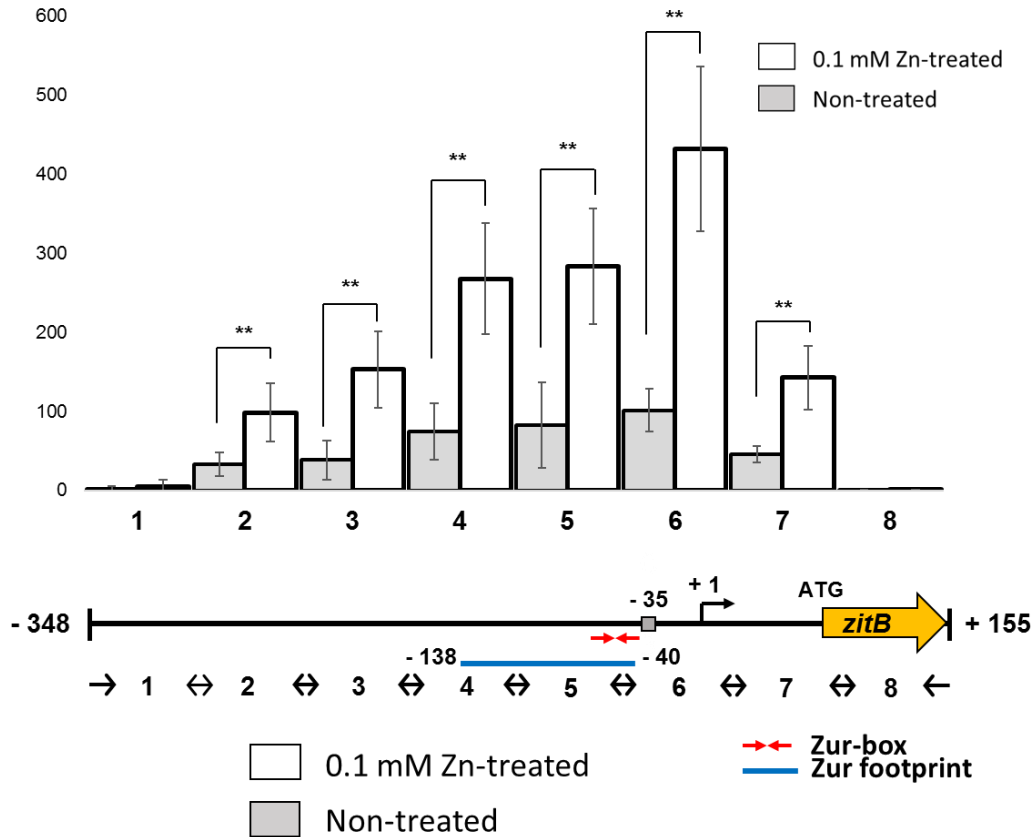

**Supplementary Figure 12. ChIP analysis of zinc-dependent binding of Zur around the *zitB* promoter region *in vivo*.** Quantitative PCR (qPCR) was performed for the chromatin samples immunoprecipitated with anti-Zur antibody. Wild type cells were either non-treated or treated with 0.1 mM ZnSO<sub>4</sub>. Overlapping primers were used to for regions 1 (88 bp, -348 ~ -260), 2 (72 bp, -280 ~ -208), 3 (71 bp, -228 ~ -157), 4 (87 bp, -177 ~ -90), 5 (75 bp, -110 ~ -35), 6 (94 bp, -55 ~ +39), 7 (65 bp, +18 ~ +83), and 8 (93 bp, +62 ~ +155). Relative enrichments were presented by taking the value from  $\Delta zur$  sample as 1.0. Three independent ChIP samples were obtained for qPCR analysis, using the Stratagene MX3000P QPCR system (Agilent Technologies). Average values with standard deviations were presented. Asterisks (\*\*) indicate measurements with P-values  $\leq 0.001$  by Student's t-test.

**Fig. 1a**

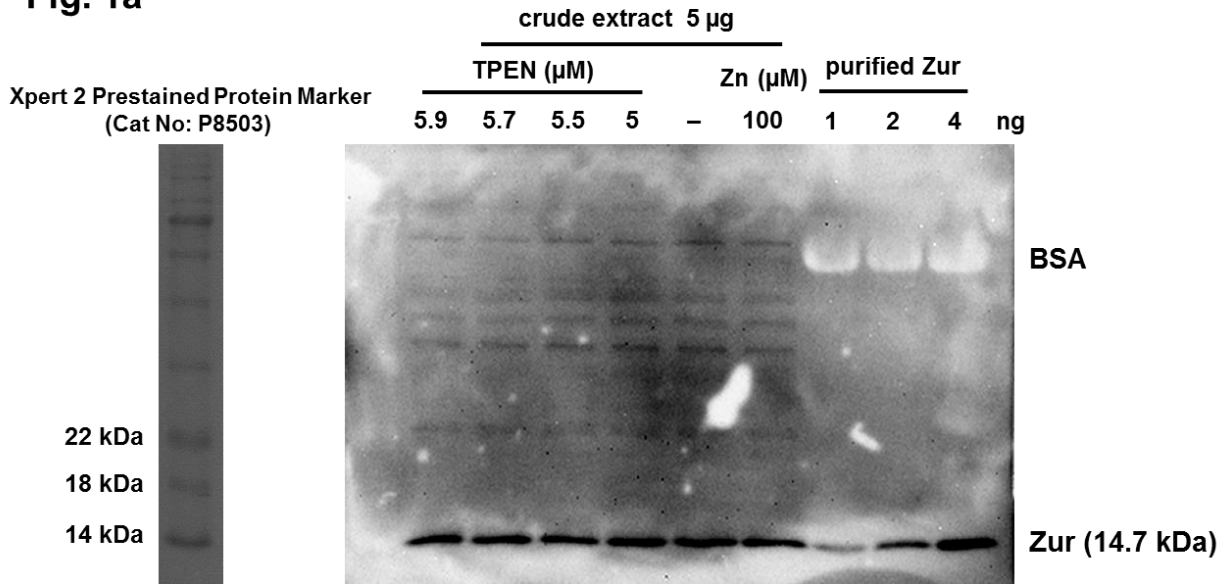

**Representative full-sized S1 mapping gel for *zitB* and *znuA* transcripts**

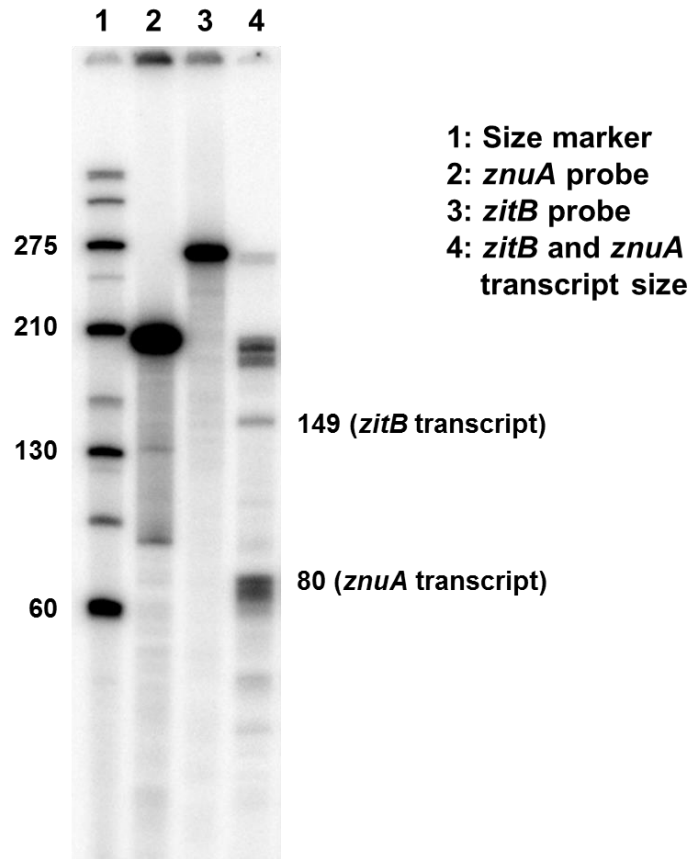

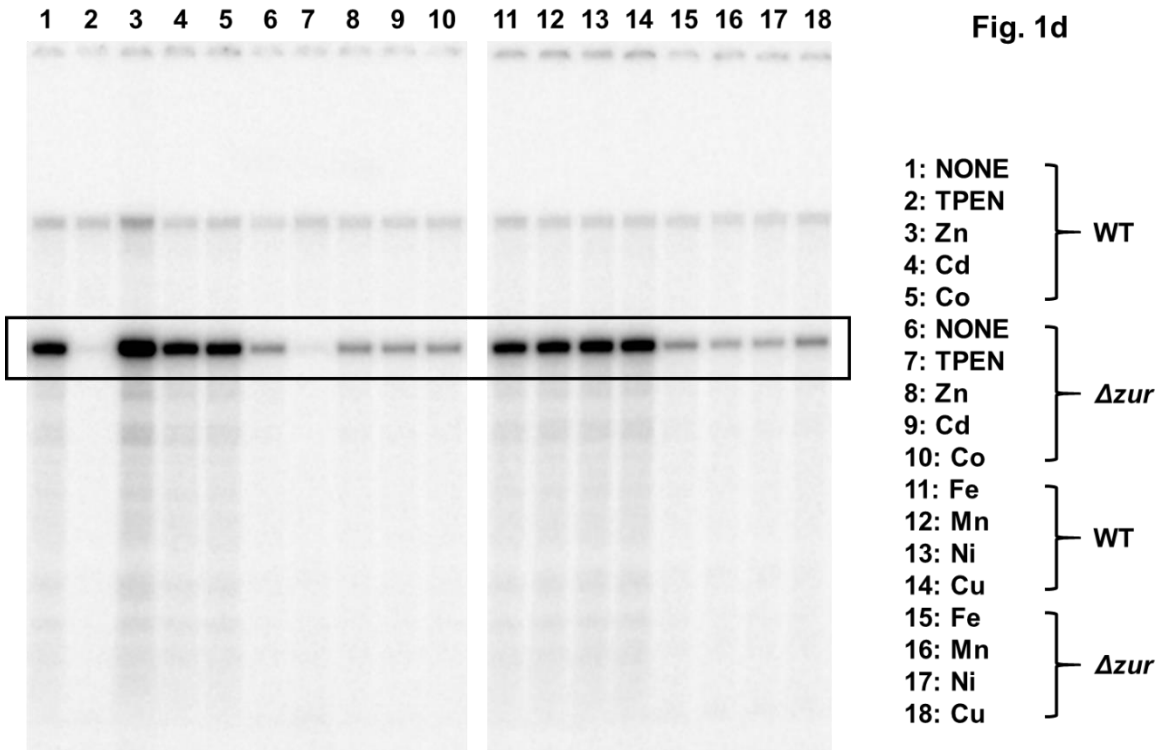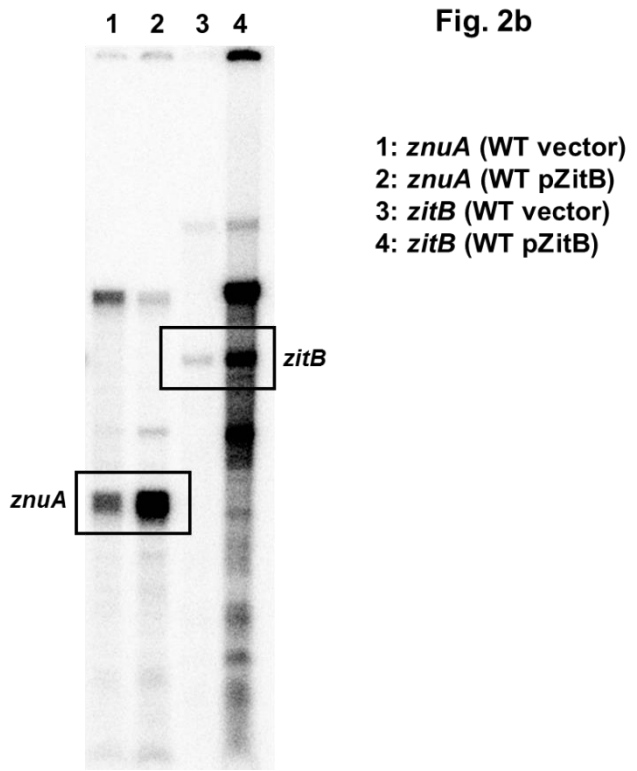

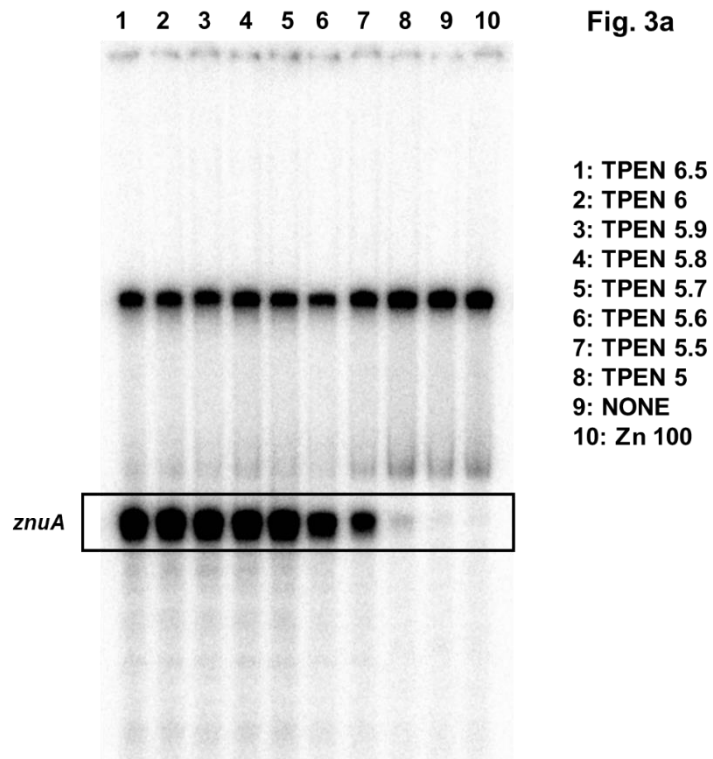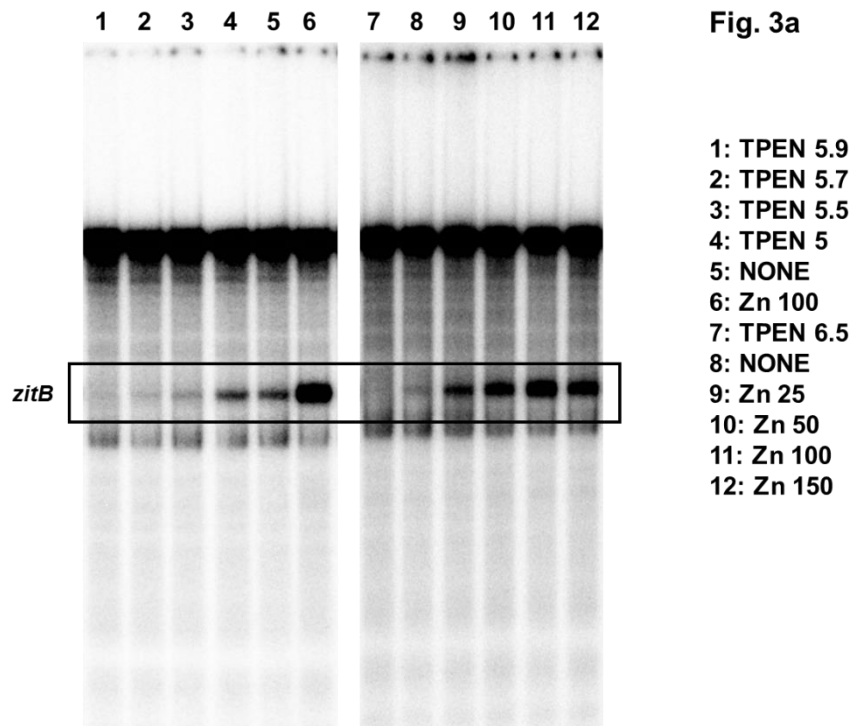

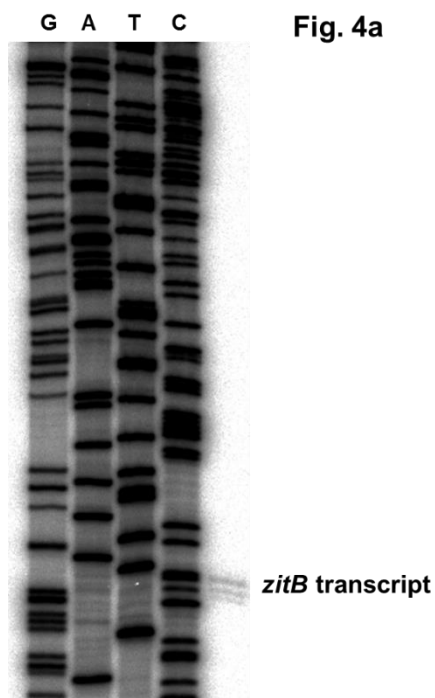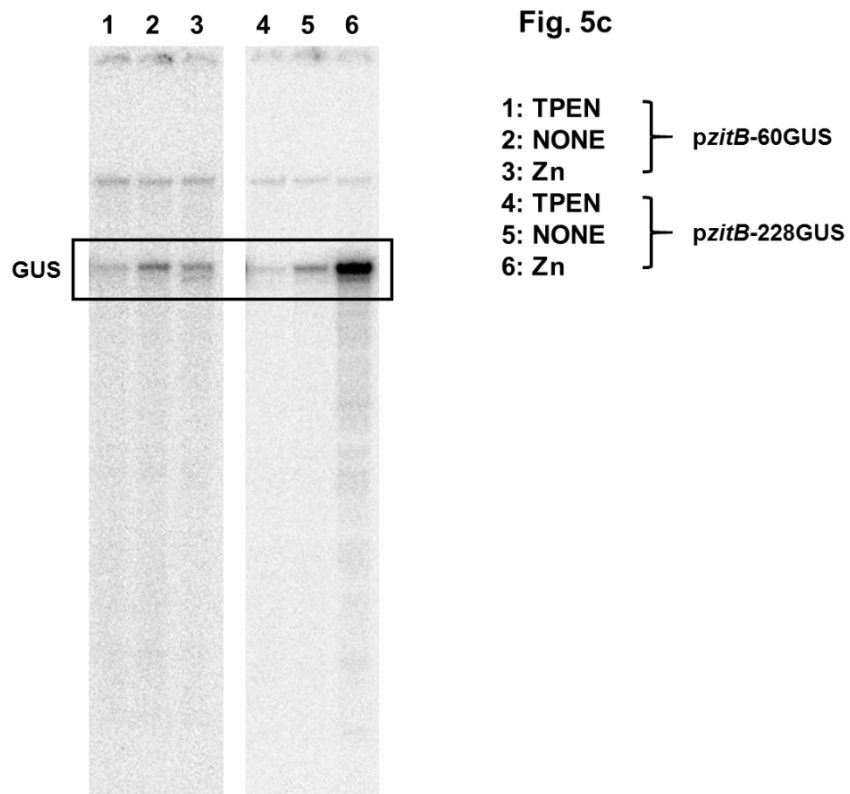

Supplementary Figure 13. Full-sized photos of Western blots and S1 mapping gels presented in the figures.

## Supplementary References

1. Shin JH, Oh SY, Kim SJ, Roe JH. The zinc-responsive regulator Zur controls a zinc uptake system and some ribosomal proteins in *Streptomyces coelicolor* A3(2). *Journal of bacteriology* **189**, 4070-4077 (2007).
2. Kallifidas D, Pascoe B, Owen GA, Strain-Damerell CM, Hong HJ, Paget MS. The zinc-responsive regulator Zur controls expression of the coelibactin gene cluster in *Streptomyces coelicolor*. *Journal of bacteriology* **192**, 608-611 (2010).
3. Schroder J, Jochmann N, Rodionov DA, Tauch A. The Zur regulon of *Corynebacterium glutamicum* ATCC 13032. *BMC Genomics* **11**, 12 (2010).
4. Chao Y, Fu D. Thermodynamic studies of the mechanism of metal binding to the *Escherichia coli* zinc transporter YiiP. *J Biol Chem* **279**, 17173-17180 (2004).
5. Paulsen IT, Saier MH, Jr. A novel family of ubiquitous heavy metal ion transport proteins. *J Membr Biol* **156**, 99-103 (1997).
6. Rahman M, et al. Probing metal ion substrate-binding to the *E. coli* ZitB exporter in native membranes by solid state NMR. *Mol Membr Biol* **25**, 683-690 (2008).
7. Wei Y, Fu D. Selective metal binding to a membrane-embedded aspartate in the *Escherichia coli* metal transporter YiiP (FieF). *J Biol Chem* **280**, 33716-33724 (2005).
8. Wei Y, Fu D. Binding and transport of metal ions at the dimer interface of the *Escherichia coli* metal transporter YiiP. *J Biol Chem* **281**, 23492-23502 (2006).
9. Guffanti AA, Wei Y, Rood SV, Krulwich TA. An antiport mechanism for a member of the cation diffusion facilitator family: divalent cations efflux in exchange for K<sup>+</sup> and H<sup>+</sup>. *Molecular microbiology* **45**, 145-153 (2002).
10. Beloin C, et al. Characterization of an Irp-like (*IrpC*) gene from *Bacillus subtilis*. *Mol Gen Genet* **256**, 63-71 (1997).
11. Ferson AE, Wray LV, Jr., Fisher SH. Expression of the *Bacillus subtilis* *gabP* gene is regulated independently in response to nitrogen and amino acid availability. *Molecular microbiology* **22**, 693-701 (1996).
12. Ikeda M, Nakagawa S. The *Corynebacterium glutamicum* genome: features and impacts on biotechnological processes. *Appl Microbiol Biotechnol* **62**, 99-109 (2003).
13. Diels L, Dong Q, van der Lelie D, Baeyens W, Mergeay M. The *czc* operon of

- Alcaligenes eutrophus* CH34: from resistance mechanism to the removal of heavy metals. *J Ind Microbiol* **14**, 142-153 (1995).
14. Munkelt D, Grass G, Nies DH. The chromosomally encoded cation diffusion facilitator proteins DmeF and FieF from *Wautersia metallidurans* CH34 are transporters of broad metal specificity. *Journal of bacteriology* **186**, 8036-8043 (2004).
  15. Uebe R, *et al.* The cation diffusion facilitator proteins MamB and MamM of *Magnetospirillum gryphiswaldense* have distinct and complex functions, and are involved in magnetite biomineralization and magnetosome membrane assembly. *Molecular microbiology* **82**, 818-835 (2011).
  16. Grover A, Sharma R. Identification and characterization of a major Zn(II) resistance determinant of *Mycobacterium smegmatis*. *Journal of bacteriology* **188**, 7026-7032 (2006).
  17. Nies DH. Efflux-mediated heavy metal resistance in prokaryotes. *FEMS Microbiol Rev* **27**, 313-339 (2003).
  18. Cubillas C, Vinuesa P, Tabche ML, Garcia-de los Santos A. Phylogenomic analysis of Cation Diffusion Facilitator proteins uncovers Ni<sup>2+</sup>/Co<sup>2+</sup> transporters. *Metallomics : integrated biometal science* **5**, 1634-1643 (2013).
  19. Spada S, Pembroke JT, Wall JG. Isolation of a novel *Thermus thermophilus* metal efflux protein that improves *Escherichia coli* growth under stress conditions. *Extremophiles* **6**, 301-308 (2002).
  20. Huang DL, *et al.* The Zur of *Xanthomonas campestris* functions as a repressor and an activator of putative zinc homeostasis genes via recognizing two distinct sequences within its target promoters. *Nucleic acids research* **36**, 4295-4309 (2008).
  21. Li S, Wang W, Li X, Fan K, Yang K. Genome-wide identification and characterization of reference genes with different transcript abundances for *Streptomyces coelicolor*. *Sci Rep* **5**, 15840 (2015).
  22. Jeong Y, *et al.* The dynamic transcriptional and translational landscape of the model antibiotic producer *Streptomyces coelicolor* A3(2). *Nat Commun* **7**, 11605 (2016).
  23. Gilston BA, *et al.* Structural and mechanistic basis of zinc regulation across the *E. coli* Zur regulon. *PLoS Biol* **12**, e1001987 (2014).
